# Supplementary material for: The Influence of the Prolactins on the Development of the Uterus in Neonatal Mice
Source: Frontiers journal article supplement (doi:10.3389/fvets.2022.818827), 2022-02-17
Supplement: Image_1.pdf [file Image_1.pdf]

(A)

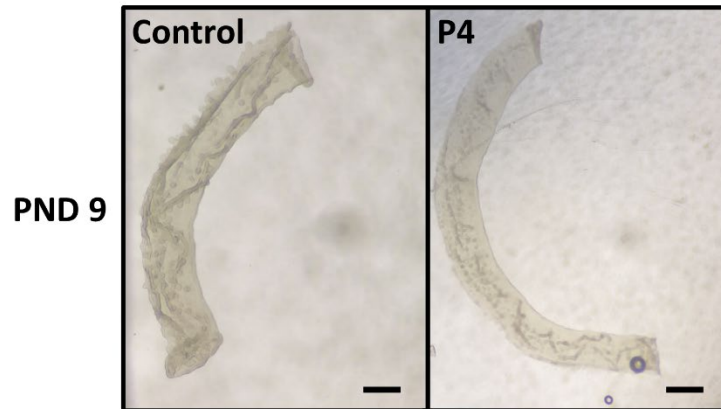

(B)

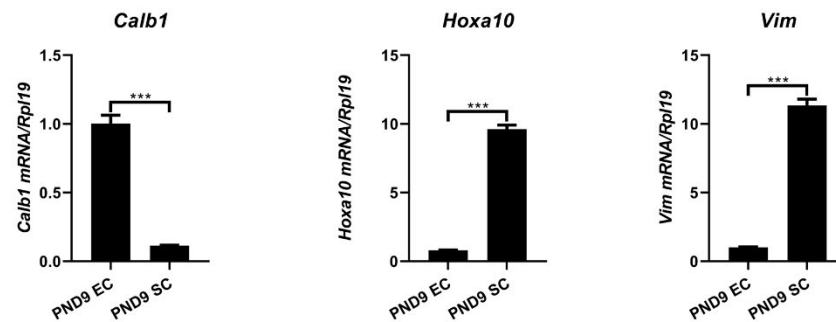

**Figure S1** Intact uterine epithelium was digested and isolated from neonatal mice and its purity verification. Representative pictures of Endometrial epithelium digested and isolated from neonatal mice, Scale bar, 500  $\mu$ m (A). The expression of epithelial cell marker *Calbindin 1* (*Calb1*) and stromal cell marker *Homeobox A10* (*Hoxa10*) and *Vimentin* (*Vim*) in EC or SC on PND9 (B). EC, epithelium cell; SC, stroma cell. Results are means  $\pm$  SEM (n = 5). Bars with different superscripts are significantly different (P < 0.05).
